# Supplementary material
Source: Springer Nature journal article supplement (https://www.springermedizin.de/resource/supplementary/13024_2011_224_MOESM4_ESM.pdf/9643690)

Transfection Ctrl

WT-CRMP2

S522A-CRMP2

Ctrl

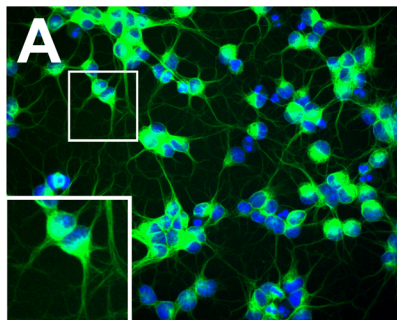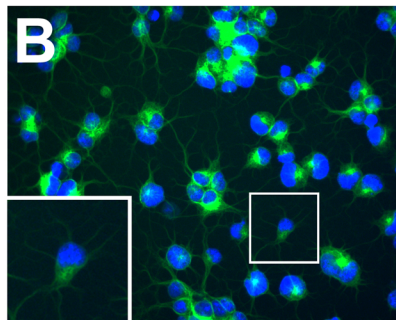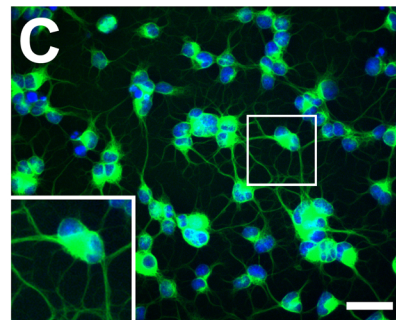

p35

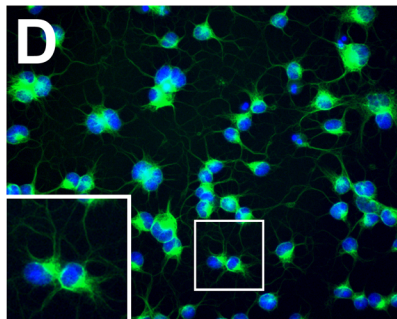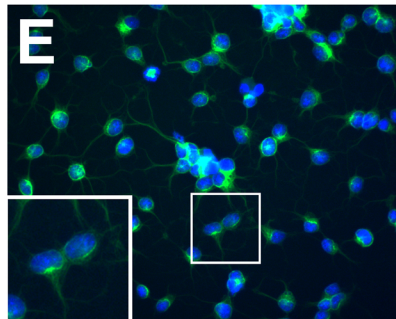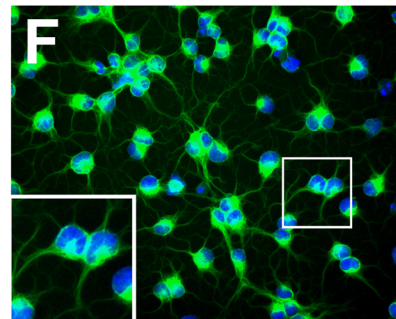

**G**

$\beta$ Tub+ Neurites

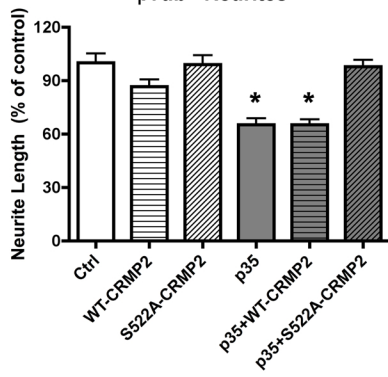

**H**

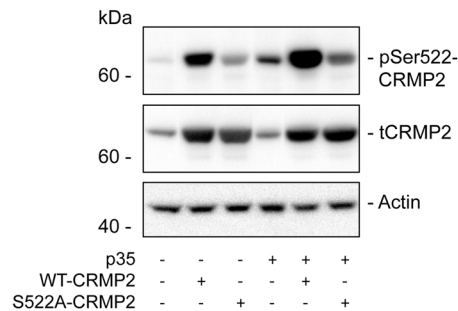

**I**

Ratio of pCRMP2/tCRMP2 immunoreactivity

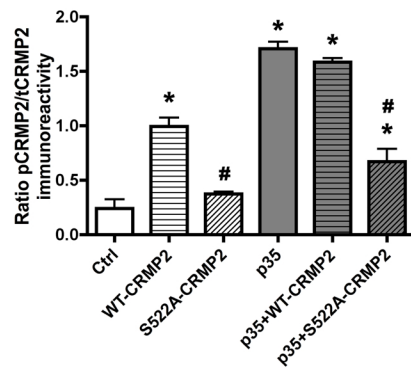

Supplement: MOESM4 [file 9643690]
